# Supplementary material for: Structural rule of heteroatom-modified single-atom catalysts for the CO2 electroreduction reaction
Source: Royal Society of Chemistry journal article supplement (doi:10.1039/d4ta06604a), 2024-11-20
Supplement: d4ta06604a1.pdf [file d4ta06604a1.pdf]

## Supporting Information

### Structural Rule of Heteroatom-Modified Single-Atom Catalysts for CO<sub>2</sub> Electroreduction Reaction

Xinyuan Sui<sup>a</sup>, Haiyang Yuan<sup>\*a</sup>, Yu Hou<sup>\*a</sup>

<sup>a</sup>Key Laboratory for Ultrafine Materials of Ministry of Education, Shanghai Engineering Research Center of Hierarchical Nanomaterials, School of Materials Science and Engineering, East China University of Science and Technology, Shanghai 200237, China.

\*Emails: yhou@ecust.edu.cn; hyyuan@ecust.edu.cn

### Note S1. Calculation for the dissolution potentials ( $U_{\text{diss}}$ ) of SACs

To assess the feasibility of SACs in electrochemical environment, we examined their electrochemical stabilities by quantitatively calculating the dissolution potentials ( $U_{\text{diss}}$ ):

$$U_{\text{diss}} = U_{\text{diss}}^0 - E_f / (n * e) \quad (1)$$

where  $U_{\text{diss}}^0$  is the standard dissolution potential for metal from experiments<sup>1</sup>, and  $n$  is the number of electrons involved in the electrochemical dissolution process.  $E_f$  is the formation energy of SACs, which can be calculated utilizing the following formula:

$$E_f = E_b - E_c = E_{\text{M-Sub}} - E_{\text{Sub}} - E_{\text{M}} - E_c \quad (2)$$

In this formula,  $E_b$  and  $E_c$  represent the binding energies of metal center and substrate, and the cohesive energy of metal, respectively.  $E_{\text{M-Sub}}$ ,  $E_{\text{Sub}}$ , and  $E_{\text{M}}$  represent the energies of the substrate with single metal atom anchored, pure substrate and single metal atom, respectively. A larger dissolution potential represents a greater electrochemical stability.

## Note S2. Calculation for the Gibbs free energy change of reaction steps in CO<sub>2</sub>RR

The electrochemical conversion of CO<sub>2</sub> into CO (CO<sub>2</sub>RR) is a process involving the transfer of two proton-coupled electron pairs whose four elementary steps can be written as:

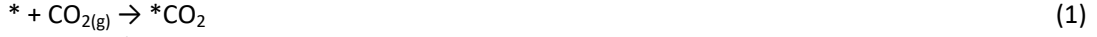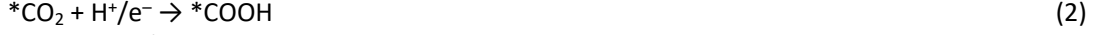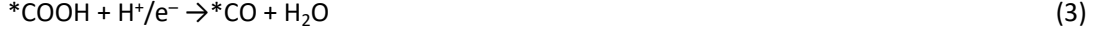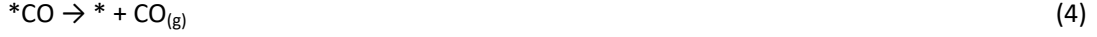

In this process, there are three key intermediates (\*CO<sub>2</sub>, \*COOH and \*CO). Here, we calculated the adsorption energies of the key intermediates in the CO<sub>2</sub>RR process with the formula:  $E_{\text{ads}}(X) = E_{X/\text{surf}} - E_{\text{surf}} - E_X$ , where  $E_{X/\text{surf}}$ ,  $E_{\text{surf}}$  and  $E_X$  represent the energies of the surface with adsorbates, the clean substrate, and adsorbates, respectively. For \*COOH,  $E_{\text{ads}}(*\text{COOH})$  was calculated by reference to the energies of CO<sub>2</sub> and 1/2H<sub>2</sub> according to the computational hydrogen electrode (CHE) model. The more negative  $E_{\text{ads}}(X)$  indicates the stronger binding strength between adsorbates and the surface.

The Gibbs free energy changes ( $\Delta G$ ) of elementary steps in CO<sub>2</sub>RR were calculated using the CHE model. In this approach, the chemical potentials of a proton-electron pair (H<sup>+</sup>/e<sup>-</sup>) and half H<sub>2</sub> molecule are equilibrated at 0 V (vs. the reversible hydrogen electrode, RHE) at all pH values<sup>2, 3</sup>. The effect of the potential on the state with an electron involved was considered by shifting the energy of  $-eU$ . Therefore, after obtaining the adsorption energy of the key intermediates, the corresponding Gibbs free energy change ( $\Delta G_i$ ) of each elementary step in CO<sub>2</sub>RR at the potential  $U$  can be calculated as follows:

$$\Delta G_1 = E(*\text{CO}_2) - E(*) - E(\text{CO}_{2(\text{g})}) + (\Delta E_{\text{ZPE}} - T\Delta S) \quad (5)$$

$$= E_{\text{ads}}(*\text{CO}_2) + (\Delta E_{\text{ZPE}} - T\Delta S)$$

$$\Delta G_2 = E(*\text{COOH}) - E(*\text{CO}_2) - E(\text{H}_2)/2 + (\Delta E_{\text{ZPE}} - T\Delta S) + eU \quad (6)$$

$$= E_{\text{ads}}(*\text{COOH}) - E_{\text{ads}}(*\text{CO}_2) + (\Delta E_{\text{ZPE}} - T\Delta S) + eU$$

$$\Delta G_3 = E(*\text{CO}) + E(\text{H}_2\text{O}) - E(*\text{COOH}) - E(\text{H}_2)/2 + (\Delta E_{\text{ZPE}} - T\Delta S) + eU \quad (7)$$

$$= E_{\text{ads}}(*\text{CO}) - E_{\text{ads}}(*\text{COOH}) + (\Delta E_{\text{ZPE}} - T\Delta S) + \Delta G_0 + eU$$

$$\Delta G_4 = E(*) + E(\text{CO}_{(\text{g})}) - E(*\text{CO}) + (\Delta E_{\text{ZPE}} - T\Delta S) \quad (8)$$

$$= -E_{\text{ads}}(*\text{CO}) + (\Delta E_{\text{ZPE}} - T\Delta S)$$

where  $E_{\text{ads}}(*\text{CO}_2)$ ,  $E_{\text{ads}}(*\text{COOH})$  and  $E_{\text{ads}}(*\text{CO})$  are the adsorption energies of \*CO<sub>2</sub>, \*COOH and \*CO, and  $\Delta G_0$  is the Gibbs free energy of CO<sub>2</sub>RR to CO from the experiment (CO<sub>2</sub> + H<sub>2</sub> → CO + H<sub>2</sub>O,  $\Delta G_0 = 0.67$  eV).  $\Delta E_{\text{ZPE}}$  and  $T\Delta S$  are the differences of the zero-point energy and entropic contributions, which result from the experimental data and vibrational frequency calculations at 298 K. The reaction maximum Gibbs free energy ( $\Delta G_{\text{max}}[\text{CO}_2\text{RR}]$ ) of the elementary steps in CO<sub>2</sub>RR is often used to evaluate the intrinsic activities of catalysts, which can be written as  $\Delta G_{\text{CO}_2\text{RR}} = \max \{\Delta G_1, \Delta G_2, \Delta G_3, \Delta G_4\}$ . The smaller  $\Delta G_{\text{CO}_2\text{RR}}$  means the better CO<sub>2</sub>RR activity of catalyst.

Regarding the effect of the solution, we employed the explicit solvation model on SACs, where 20 H<sub>2</sub>O molecules were applied above the surface as an initial aqueous network at the liquid/solid interface (Fig. S4). First, we performed the ab initio molecular dynamics (AIMD) simulation of the H<sub>2</sub>O structure on SACs (Fig. S4). Only the  $\Gamma$ -point was used to sample the Brillouin zone. The simulation temperature was set to 300 K with a 1 fs movement for each step in the canonical (NVT) ensemble employing Nosé-Hoover thermostats. We selected the H<sub>2</sub>O structure from the stabilized MD simulations (small fluctuation in energy after MD simulations), and then optimized intermediates adsorbed on SACs to obtain the total energy ( $E_{\text{tot}}$ ) of each structure with this H<sub>2</sub>O structure involved. Considering that the solution structures of the water network on different SACs after optimization could change, which may still affect  $E_{\text{tot}}$ , we deducted the contribution of the

water solution in  $E_{\text{tot}}$  but still considered the solvation effect for each sample as follows: (i) we calculate the total energy of the water solution ( $E_{\text{H}_2\text{O}}$ ) in the optimized structures; (ii) we deduct  $E_{\text{H}_2\text{O}}$  from  $E_{\text{tot}}$  to obtain the solvation-included energy of each structure ( $\Delta E$ ):  $\Delta E = E_{\text{tot}} - E_{\text{H}_2\text{O}}$ .

**Table S1.** The specific applied U-J value ( $U_{\text{eff}}$ ) of 3d metals for DFT calculations<sup>4</sup>.

| 3d               | Mn   | Fe   | Co   |
|------------------|------|------|------|
| $U_{\text{eff}}$ | 3.06 | 3.29 | 3.42 |

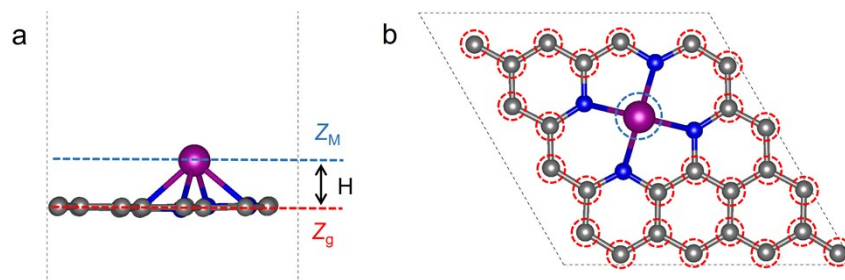

**Fig. S1** Scheme for calculating the height (i.e.,  $H$ ) of the metal center above the graphene surface. The graphene surface is chosen as the benchmark to calculate the height (i.e.,  $H$ ) of the metal center. Due to the structural relaxation, the positions of C atoms in the graphene could change to a certain extent. We averaged the z-coordinates of all C atoms in the graphene (denoted as  $Z_g$ ), and then calculated the difference between  $Z_g$  and the z-coordinate ( $Z_M$ ) of metal center as the height (i.e.,  $H$ ) of the metal center above the graphene surface ( $H = Z_M - Z_g$ ).

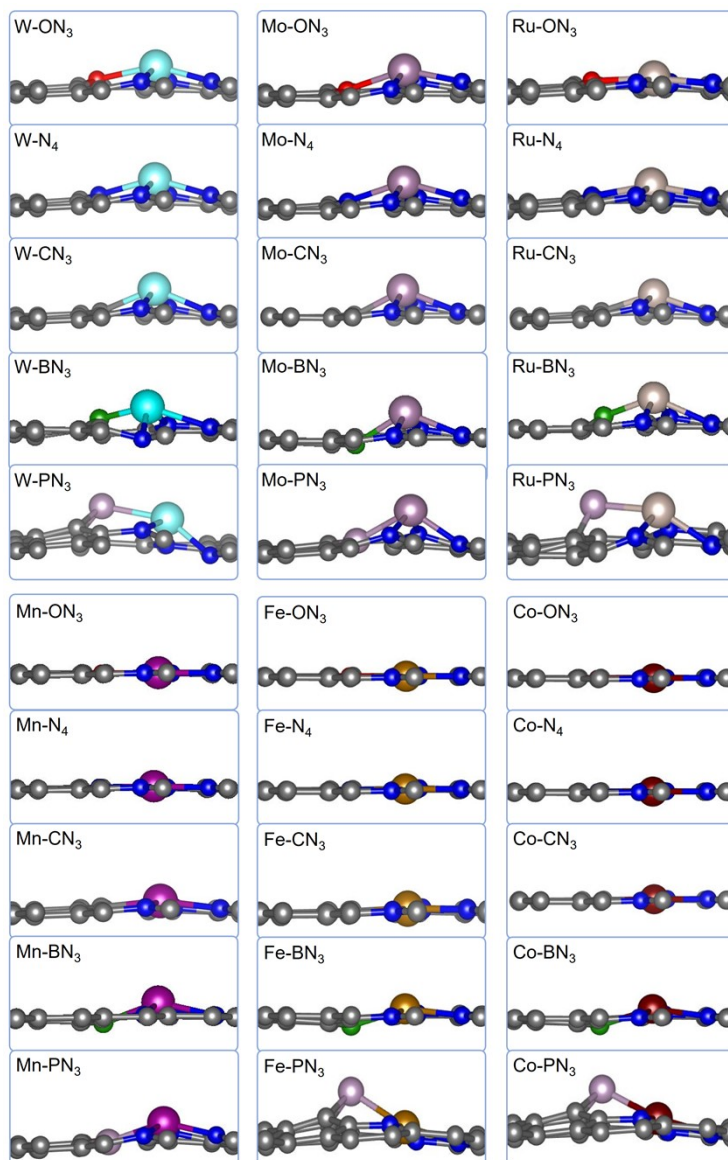

**Fig. S2** Configuration of each M-XN<sub>3</sub> SACs (M = W, Mo, Ru, Mn, Fe and Co and X = O, N, C, B and P).

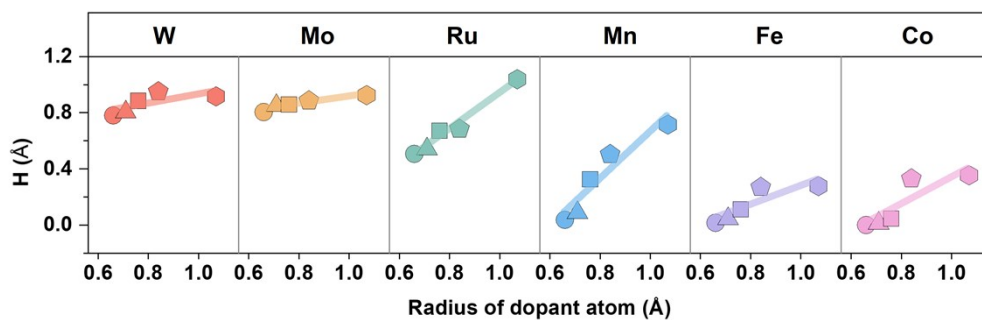

**Fig. S3** Linear relationships between the height (i.e., H) of the metal center above the graphene surface and the radius of the ligand X atom on different SACs.



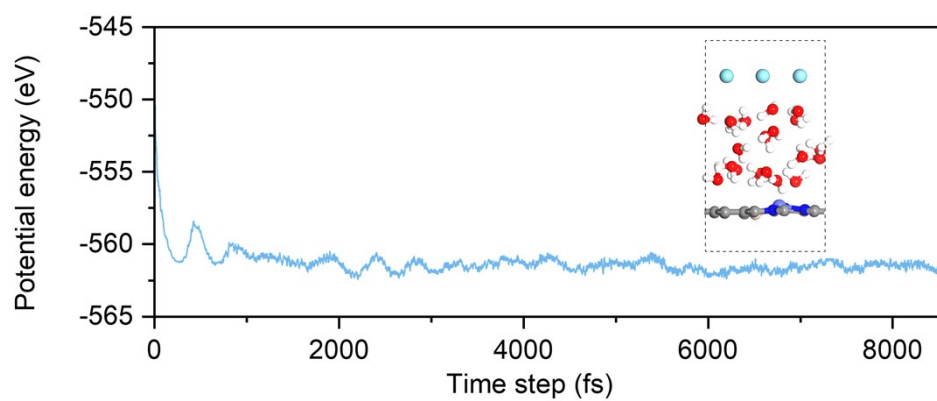

**Fig. S4** Explicit solvation model (20 H<sub>2</sub>O molecules) upon SACs and the potential energy variation from its corresponding AIMD simulation.

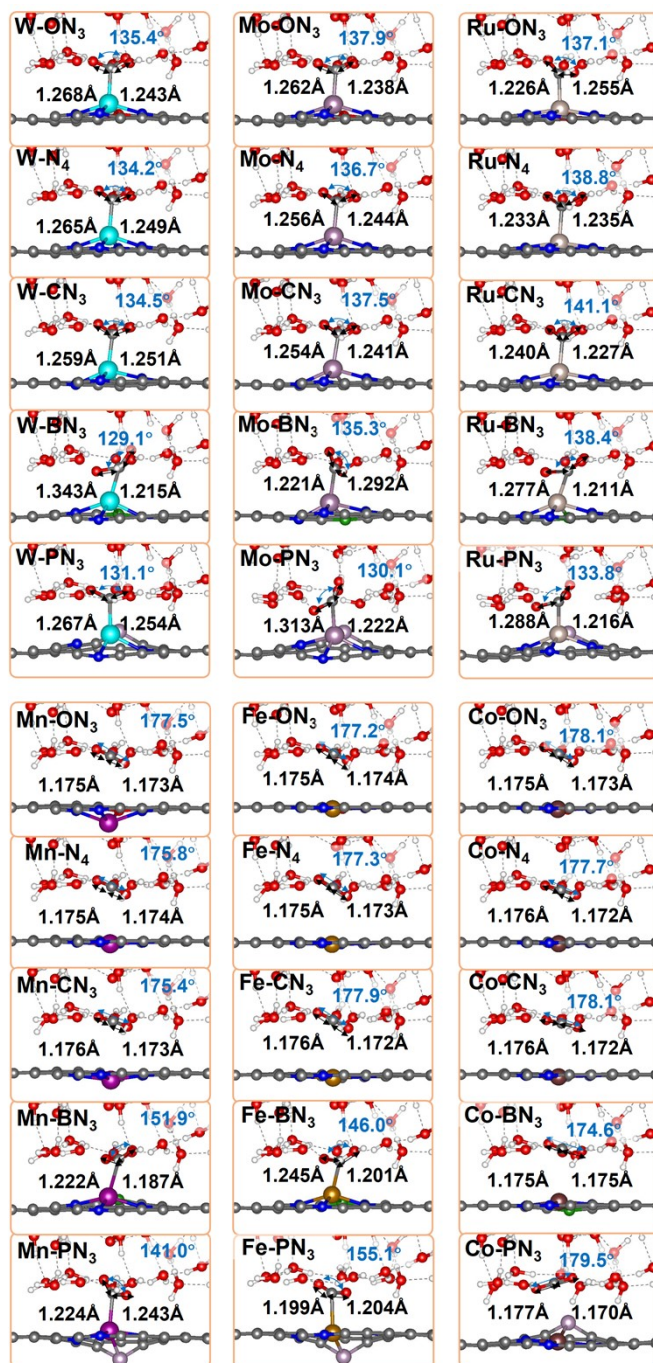

Fig. S5 Adsorption configuration of CO<sub>2</sub> on each M-XN<sub>3</sub> SACs.

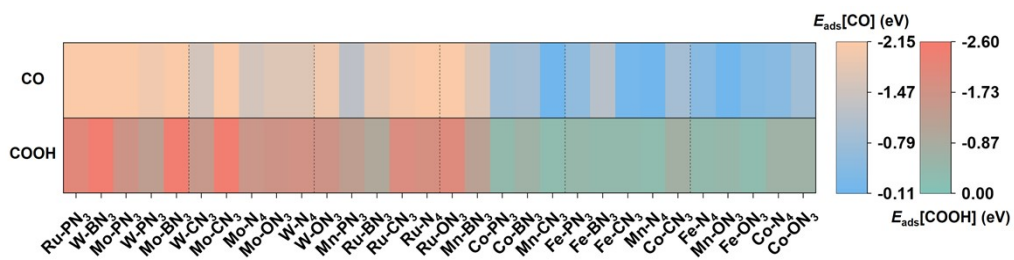

Fig. S6 Adsorption energies of CO and COOH on each M-XN<sub>3</sub> SACs.

## Reference

1. X. Guo, J. Gu, S. Lin, S. Zhang, Z. Chen and S. Huang, *J. Am. Chem. Soc.*, 2020, **142**, 5709-5721.
2. J. K. Nørskov, J. Rossmeisl, A. Logadottir, L. Lindqvist, J. R. Kitchin, T. Bligaard and H. Jónsson, *J. Phys. Chem. B*, 2004, **108**, 17886.
3. A. J. Garza, A. T. Bell and M. Head-Gordon, *ACS Catal.*, 2018, **8**, 1490.
4. Y. Lin, L. Zhang, Z. Zhao and Z. Xia, *Adv. Mater.*, 2017, **29**, 1606635.
